# Supplementary material for: Trajectory patterns of blood pressure change up to six years and the risk of dementia: a nationwide cohort study
Source: Aging (Albany NY). 2021 Jul 1;13(13):17380–406. doi: 10.18632/aging.203228 (PMC8312414; doi:10.18632/aging.203228)
Supplement: Supplementary Figures [file aging-13-203228-s001.pdf]

SUPPLEMENTARY FIGURES

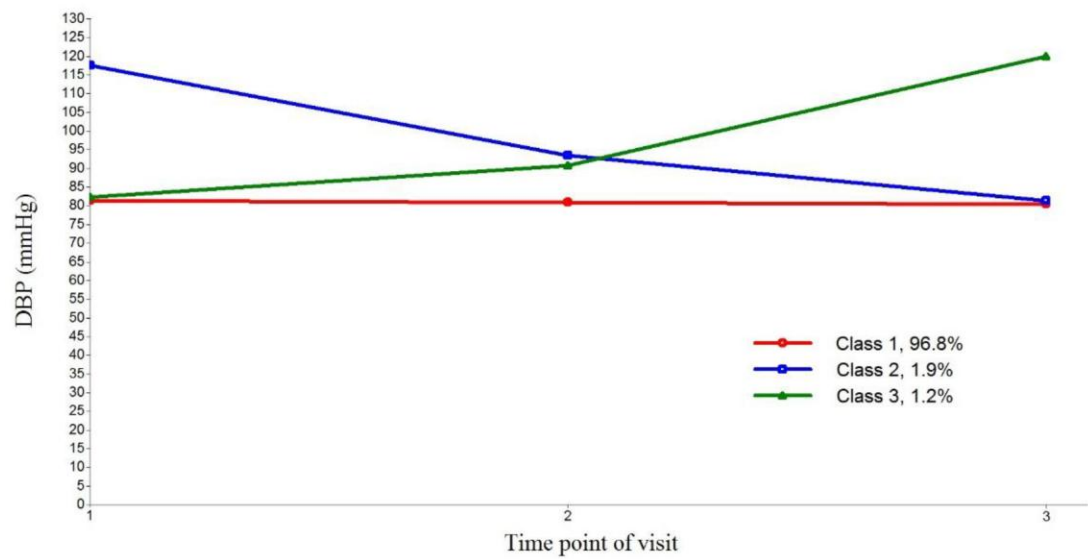

**Supplementary Figure 1. Three latent trajectories of diastolic blood pressure (DBP) for Chinese older people.** The latent growth mixture model was used to estimate the DBP trajectories. Class 1, normal DBP; class 2, stabilized DBP; class 3, elevated DBP.

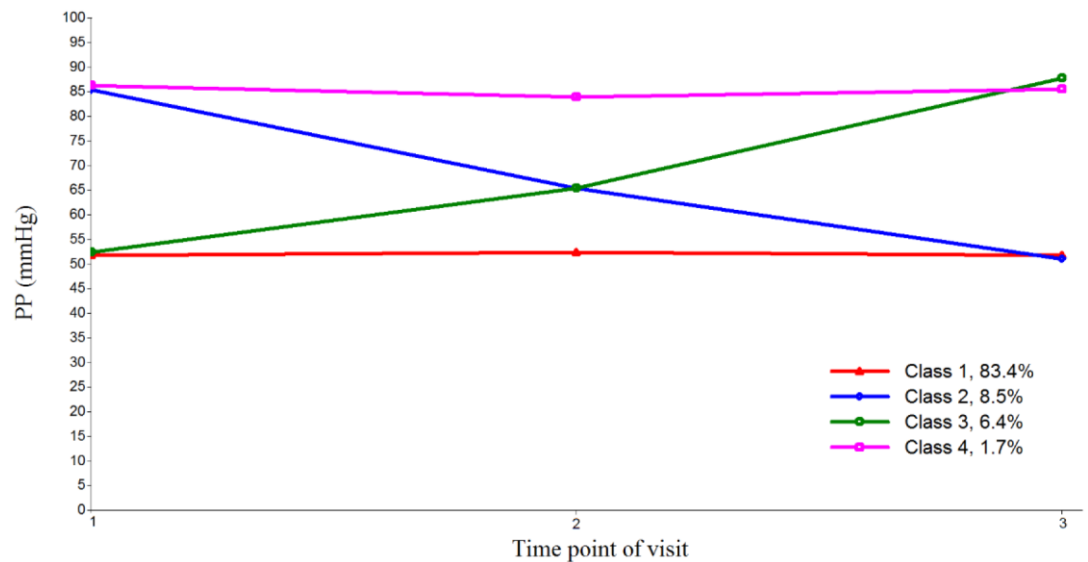

**Supplementary Figure 2. Four latent trajectories of pulse pressure (PP) for Chinese older people.** The latent growth mixture model was used to estimate the PP trajectories. Class 1, normal PP; class 2, stabilized PP; class 3, elevated PP; and class 4, persistently high PP.

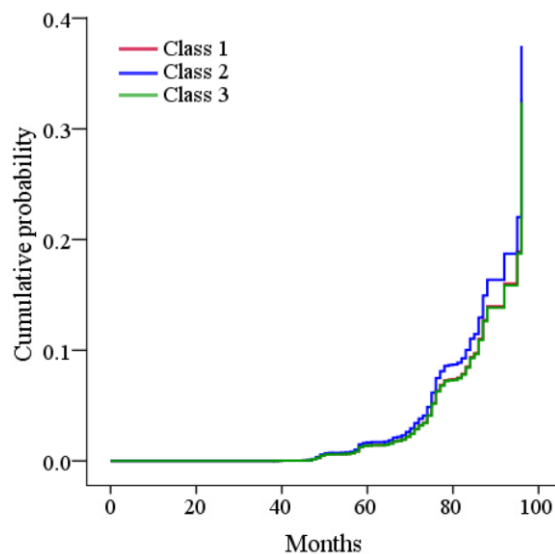

**Supplementary Figure 3. Survival curves of the cumulative incidence of dementia by trajectory classes of diastolic blood pressure (DBP) in the final adjusted model.** The Cox-proportional hazard model was used to plot the survival curves. Class 1, normal DBP; class 2, stabilized DBP; class 3, elevated DBP.

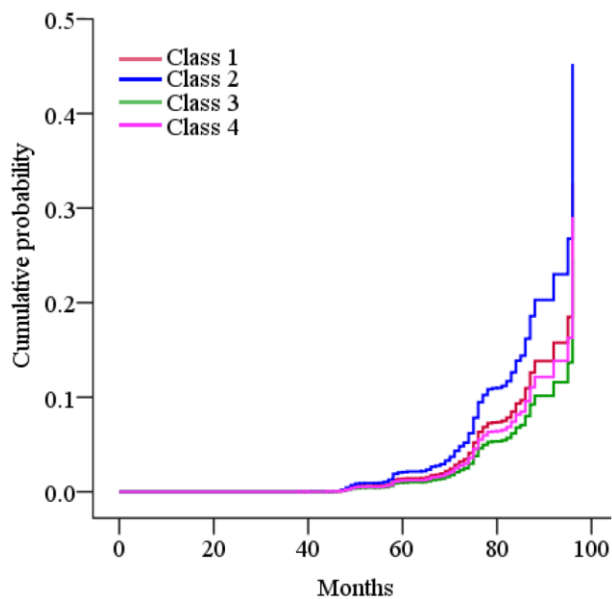

**Supplementary Figure 4. Survival curves of the cumulative incidence of dementia by trajectory classes of pulse pressure (PP) in the final adjusted model.** The Cox-proportional hazard model was used to plot the survival curves. Class 1, normal PP; class 2, stabilized PP; class 3, elevated PP; and class 4, persistently high PP.

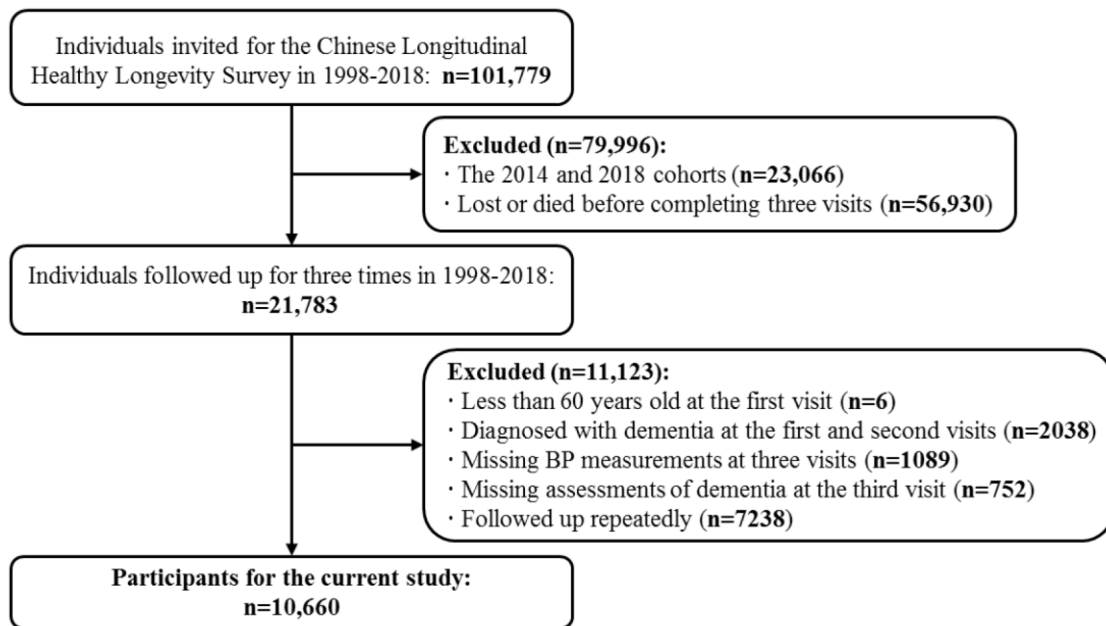

Supplementary Figure 5. Flowchart of the study population.
