# Supplementary material for: Trajectory patterns of blood pressure change up to six years and the risk of dementia: a nationwide cohort study
Source: publisher site journal article supplement (doi:10.18632/aging.203228), 2021-07-01
Supplement: Supplementary file [file aging-v13i13-203228-supplementary-material-SD4.pdf]

**Supplementary Table 5. Demographic and clinical characteristics of CLHLS participants by DBP trajectory classes.**

| <b>Characteristics</b>               | <b>Overall<br/>(n=10660)</b> | <b>Class 1<br/>(n=10324)</b> | <b>Class 2<br/>(n=203)</b> | <b>Class 3<br/>(n=133)</b> | <b>P value</b> |
|--------------------------------------|------------------------------|------------------------------|----------------------------|----------------------------|----------------|
| 80-115 years old <sup>a</sup>        | 6881(64.5)                   | 6634(64.3)                   | 143(70.4)                  | 104(78.2) <sup>b</sup>     | 0.001          |
| Female                               | 5755(54.0)                   | 5567(53.9)                   | 116(57.1)                  | 72(54.1)                   | 0.660          |
| Han nationality                      | 9916(93.0)                   | 9600(93.0)                   | 190(93.6)                  | 126(94.7)                  | 0.696          |
| Education                            |                              |                              |                            |                            |                |
| No schooling                         | 6008(56.4)                   | 5816(56.3)                   | 114(56.2)                  | 78(58.6)                   | 0.575          |
| Primary school                       | 3439(32.3)                   | 3328(32.2)                   | 65(32.0)                   | 46(34.6)                   |                |
| White-collar                         | 964(9.0)                     | 937(9.1)                     | 21(10.3)                   | 6(4.5)                     | 0.153          |
| Average household income (yuan)      |                              |                              |                            |                            |                |
| < 5000                               | 5020(47.1)                   | 4837(46.9)                   | 109(53.7)                  | 74(55.6)                   | 0.002          |
| 5000-19999                           | 3955(37.1)                   | 3836(37.2)                   | 66(32.5)                   | 53(39.8)                   |                |
| Place of residence                   |                              |                              |                            |                            |                |
| City                                 | 2294(21.5)                   | 2224(21.5)                   | 50(24.6)                   | 20(15.0)                   | 0.173          |
| Town                                 | 3353(31.5)                   | 3257(31.5)                   | 54(26.6)                   | 42(31.6)                   |                |
| Smoking status                       |                              |                              |                            |                            |                |
| Current                              | 1695(15.9)                   | 1653(16.0)                   | 21(10.3)                   | 21(15.8)                   | 0.165          |
| Past                                 | 2076(19.5)                   | 2009(19.5)                   | 46(22.7)                   | 21(15.8)                   |                |
| Alcohol use                          |                              |                              |                            |                            |                |
| Current                              | 1715(16.1)                   | 1669(16.2)                   | 20(9.9)                    | 26(19.5)                   | 0.043          |
| Past                                 | 1762(16.5)                   | 1694(16.4)                   | 43(21.2)                   | 25(18.8)                   |                |
| Regular exercise                     |                              |                              |                            |                            |                |
| Current                              | 3068(28.8)                   | 2973(28.8)                   | 57(28.1)                   | 38(28.6)                   | 0.263          |
| Past                                 | 1811(17.0)                   | 1739(16.8)                   | 45(22.2)                   | 27(20.3)                   |                |
| Sleep quality                        |                              |                              |                            |                            |                |
| Very good or good                    | 6240(58.5)                   | 6041(58.5)                   | 117(57.6)                  | 82(61.7)                   | 0.679          |
| Fair                                 | 2987(28.0)                   | 2898(28.1)                   | 59(29.1)                   | 30(22.6)                   |                |
| Sleep duration (hours)               | 8.00(4.00)                   | 8.00(4.00)                   | 8.00(4.00)                 | 8.00(4.00)                 | 0.305          |
| Living alone                         | 1621(15.2)                   | 1574(15.2)                   | 30(14.8)                   | 17(12.8)                   | 0.723          |
| Heart rate (beat/ minute)            | 73(12)                       | 73(12)                       | 72(12)                     | 75(15)                     | 0.189          |
| Body mass index (kg/m <sup>2</sup> ) | 20.05(5.31)                  | 20.05(5.31)                  | 20.00(4.94)                | 20.00(4.98)                | 0.877          |
| Diabetes                             | 1659(15.6)                   | 1620(15.7)                   | 21(10.3)                   | 18(13.5)                   | 0.093          |
| Heart disease                        | 2272(21.3)                   | 2184(21.2)                   | 57(28.1)                   | 31(23.3)                   | 0.050          |
| Cerebrovascular disease              | 1800(16.9)                   | 1736(16.8)                   | 38(18.7)                   | 26(19.5)                   | 0.550          |
| Respiratory disease                  | 2076(19.5)                   | 2021(19.6)                   | 28(13.8)                   | 27(20.3)                   | 0.116          |
| Cancer                               | 900(8.4)                     | 880(8.5)                     | 8(3.9)                     | 12(9.0)                    | 0.065          |
| Dementia                             | 1049(9.8)                    | 1021(9.9)                    | 14(6.9)                    | 14(10.5)                   | 0.353          |

DBP, diastolic blood pressure. Data are obtained at the third visit unless noted and expressed as numbers (percentages) or median (interquartile range). Class 1, normal DBP; class 2, stabilized DBP; class 3, elevated DBP.

<sup>a</sup>Obtained at the first visit.

<sup>b</sup>There are statistically significant differences in the pairwise comparison between this class and class 1 trajectory.

**Supplementary Table 6. Demographic and clinical characteristics of CLHLS participants by PP trajectory classes.**

| Characteristics                      | Class 1<br>(n=8889) | Class 2<br>(n=904)     | Class 3<br>(n=683)       | Class 4<br>(n=184)       | P value |
|--------------------------------------|---------------------|------------------------|--------------------------|--------------------------|---------|
| 80-115 years old <sup>a</sup>        | 5641(63.5)          | 708(78.3) <sup>b</sup> | 410(60.0)                | 122(66.3)                | <0.001  |
| Female                               | 4714(53.0)          | 527(58.3) <sup>b</sup> | 395(57.8)                | 119(64.7) <sup>b</sup>   | <0.001  |
| Han nationality                      | 8260(92.9)          | 848(93.8)              | 638(93.4)                | 170(92.4)                | 0.739   |
| Education                            |                     |                        |                          |                          |         |
| No schooling                         | 4940(55.6)          | 555(61.4) <sup>b</sup> | 407(59.6)                | 106(57.6)                | 0.020   |
| Primary school                       | 2916(32.8)          | 262(29.0)              | 202(29.6)                | 59(32.1)                 |         |
| White-collar                         | 811(9.1)            | 83(9.2)                | 49(7.2)                  | 21(11.4)                 | 0.236   |
| Average household income (yuan)      |                     |                        |                          |                          |         |
| < 5000                               | 4207(47.3)          | 457(50.6)              | 285(41.7) <sup>b</sup>   | 71(38.6)                 | 0.003   |
| 5000-19999                           | 3283(36.9)          | 323(35.7)              | 274(40.1)                | 75(40.8)                 |         |
| Place of residence                   |                     |                        |                          |                          |         |
| City                                 | 1940(21.8)          | 208(23.0)              | 112(16.4) <sup>b</sup>   | 34(18.5)                 | <0.001  |
| Town                                 | 2819(31.7)          | 275(30.4)              | 223(32.7)                | 36(19.6) <sup>b</sup>    |         |
| Smoking status                       |                     |                        |                          |                          |         |
| Current                              | 1442(16.2)          | 121(13.4)              | 109(16.0)                | 23(12.5)                 | 0.064   |
| Past                                 | 1748(19.7)          | 160(17.7)              | 137(20.1)                | 31(16.8)                 |         |
| Alcohol use                          |                     |                        |                          |                          |         |
| Current                              | 1447(16.3)          | 132(14.6)              | 111(16.3)                | 25(13.6)                 | 0.002   |
| Past                                 | 1511(17.0)          | 138(15.3)              | 99(14.5)                 | 14(7.6)                  |         |
| Regular exercise                     |                     |                        |                          |                          |         |
| Current                              | 2605(29.3)          | 227(25.1) <sup>b</sup> | 188(27.5)                | 48(26.1)                 | 0.004   |
| Past                                 | 1526(17.2)          | 168(18.6)              | 92(13.5)                 | 25(13.6)                 |         |
| Sleep quality                        |                     |                        |                          |                          |         |
| Very good or good                    | 5187(58.4)          | 528(58.4)              | 422(61.8)                | 103(56.0)                | 0.173   |
| Fair                                 | 2515(28.3)          | 259(28.7)              | 159(23.3)                | 54(29.3)                 |         |
| Sleep duration (hours)               | 8.00(4.00)          | 8.00(4.00)             | 8.00(4.00)               | 8.00(4.00)               | 0.772   |
| Living alone                         | 1330(15.0)          | 156(17.3)              | 105(15.4)                | 30(16.3)                 | 0.315   |
| Heart rate (beat/ minute)            | 73(12)              | 72(12)                 | 73(14)                   | 74(13)                   | 0.057   |
| Body mass index (kg/m <sup>2</sup> ) | 20.00(5.26)         | 20.20(5.19)            | 20.41(5.64) <sup>b</sup> | 21.26(6.34) <sup>b</sup> | <0.001  |
| Diabetes                             | 1381(15.5)          | 162(17.9)              | 83(12.2)                 | 33(17.9)                 | 0.014   |
| Heart disease                        | 1864(21.0)          | 225(24.9) <sup>b</sup> | 138(20.2)                | 45(24.5)                 | 0.028   |
| Cerebrovascular disease              | 1496(16.8)          | 174(19.2)              | 99(14.5)                 | 31(16.8)                 | 0.094   |
| Respiratory disease                  | 1765(19.9)          | 188(20.8)              | 86(12.6) <sup>b</sup>    | 37(20.1)                 | <0.001  |
| Cancer                               | 752(8.5)            | 95(10.5)               | 39(5.7)                  | 14(7.6)                  | 0.008   |
| Dementia                             | 887(10.0)           | 106(11.7)              | 43(6.3) <sup>b</sup>     | 13(7.1)                  | 0.002   |

PP, pulse pressure. Data are obtained at the third visit unless noted and expressed as numbers (percentages) or median (interquartile range). Class 1, normal PP; class 2, stabilized PP; class 3, elevated PP; and class 4, persistently high PP.

<sup>a</sup>Obtained at the first visit.

<sup>b</sup>There are statistically significant differences in the pairwise comparison between this class and class 1 trajectory.
